# Supplementary material for: Uncovering Hidden Pathways: Structural Brain Networks Underpinning Connected Speech in Post-Stroke Aphasia
Source: Research Square preprint supplement (doi:10.21203/rs.3.rs-5587181/v1), 2024-12-17
Supplement: Supplementary file 1 [file 8bcd3675ac7d1fb43dd4e285.docx]

**Supplementary**

**S1. Materials for custom picture description tasks**

The stimuli were divided into 4 blocks of 100 drawings each, with a break provided after each block. The custom picture description task comprised 4 colored scene images, each containing a subset of 100 items. Figures 1-4 present these 4 scene images, and Tables 1-4 list the corresponding 100 target items in each scene.

Participants were presented with the pictures one by one and were given 5 minutes to describe what is happening in the picture using full sentences. Participants responses were audio-recorded and the audio was encoded as transcripts. These formatted transcripts served as inputs in FLAT (Zimmerer et al., 2018, 2020).


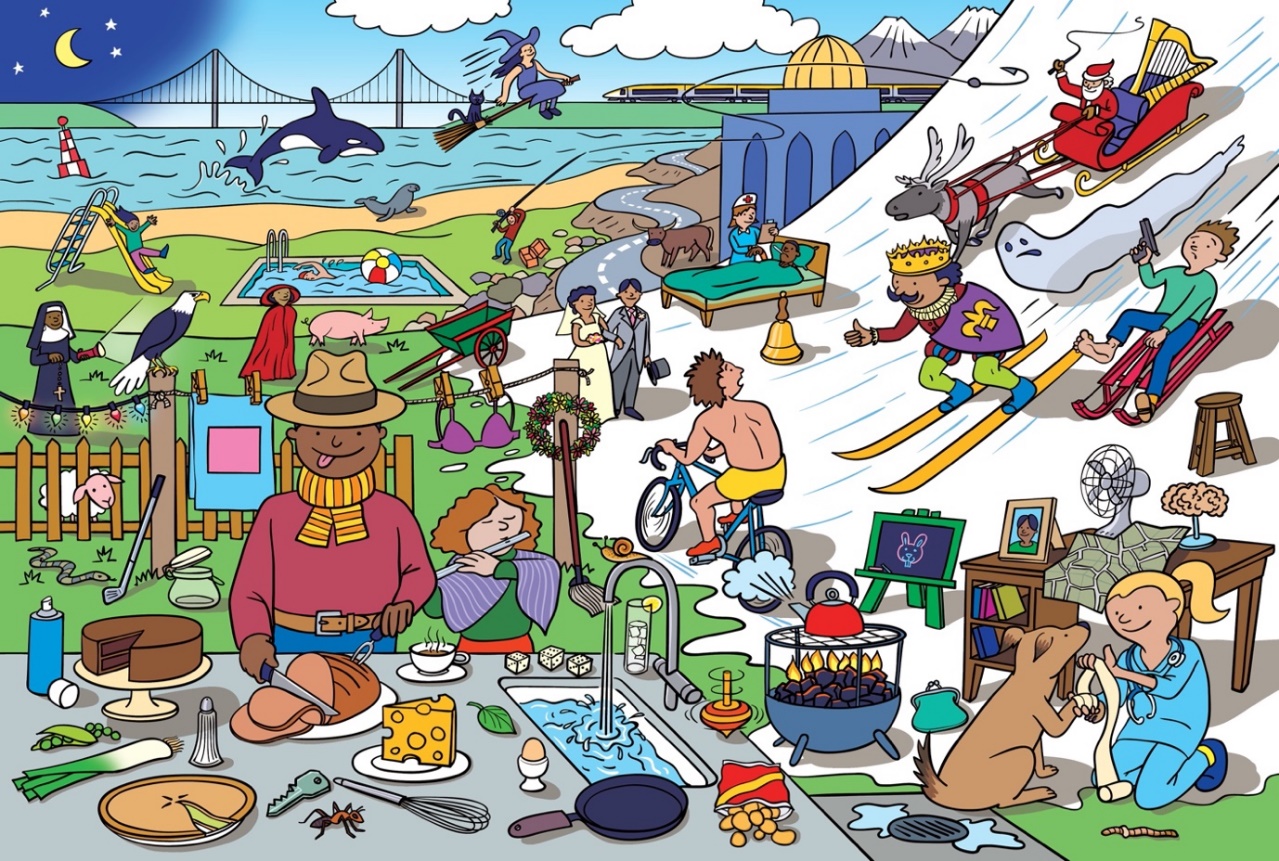


**Figure 1.** Picture 1 of 4 used in the custom picture description task.

**Table 1.** Target words embedded in Picture 1.

| Picture 1: 100 items | | | | |
| --- | --- | --- | --- | --- |
| ant | coal | hat | pig | spray |
| back | crisps | hook | pool | square |
| ball | cup | ice | purse | steam |
| beak | desk | jar | road | stool |
| bed | dice | key | rock | swim |
| bell | dome | king | rope | tap |
| belt | drain | knee | salt | thumb |
| bike | egg | knife | scarf | toe |
| board | fan | leaf | seal | tongue |
| bra | fence | leek | shawl | top |
| brain | fire | lights | sheep | torch |
| bride | flute | map | shelves | towel |
| bull | frame | moon | shield | train |
| buoy | ghost | mop | sink | vet |
| cake | girl | nun | skis | whale |
| cape | groom | nurse | sled | whip |
| cart | gun | pan | sleigh | whisk |
| cheese | ham | peas | slide | witch |
| claw | hand | peg | snail | worm |
| club | harp | pie | snake | wreath |


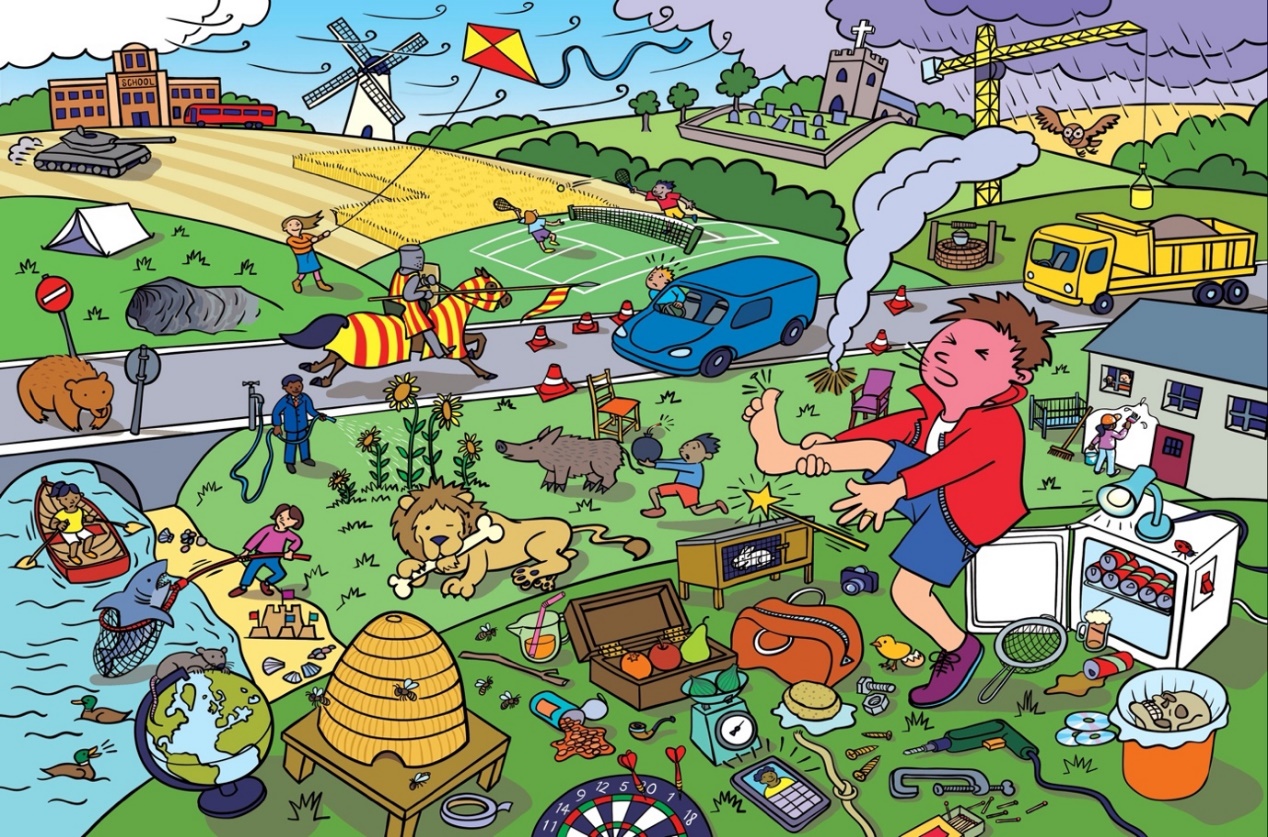


**Figure 2.** Picture 2 of 4 used in the custom picture description task.

**Table 2.** Target words embedded in Picture 2.

| Picture 2: 100 items | | | | |
| --- | --- | --- | --- | --- |
| bag | cone | hive | pear | smoke |
| beach | cot | hose | phone | sponge |
| bean | court | hutch | pin | stalk |
| bear | crane | jail | pipe | stick |
| bee | cross | jug | plant | straw |
| beer | dart | kite | rain | suit |
| bin | disc | knight | rat | switch |
| boar | drill | knot | ring | tank |
| bomb | duck | lamp | roof | tape |
| bone | ear | lens | scale | tent |
| box | fig | lion | school | tire |
| broom | foot | match | screen | tree |
| bug | fridge | mill | screw | truck |
| can | fruit | mouth | seat | van |
| cap | glass | net | shark | wall |
| cave | globe | nut | shell | wand |
| chair | grass | oar | shoe | well |
| chick | grave | owl | sieve | wheat |
| clamp | head | paint | sign | wind |
| coach | hinge | paw | skull | zip |

**
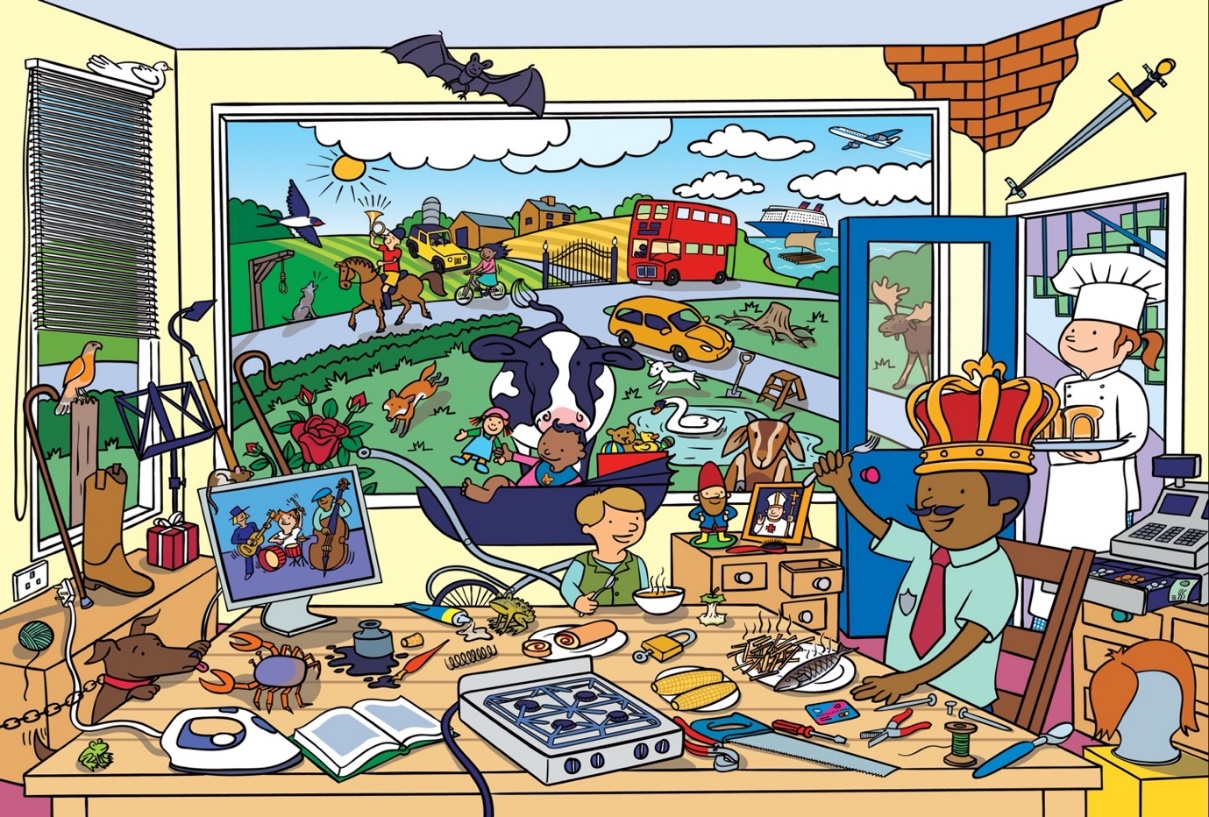
**

**Figure 3.** Picture 3 of 4 used in the custom picture description task.

**Table 3.** Target words embedded in Picture 3.

| Picture 3: 100 items | | | | |
| --- | --- | --- | --- | --- |
| arm | cloud | gnome | plane | stand |
| badge | core | goat | plate | step |
| band | cork | hawk | pliers | stove |
| bat | corn | hedge | plug | stump |
| bib | cow | hoe | pope | sun |
| bird | crab | hoof | pram | swan |
| blind | crook | horn | raft | sword |
| book | crown | ink | roll | thread |
| boot | dog | iron | root | tie |
| bowl | doll | jeep | rose | till |
| boy | door | knob | saw | toad |
| bricks | dove | lamb | scoop | toast |
| brush | farm | leg | ship | tools |
| bus | fish | lock | shorts | toys |
| cane | fork | man | skirt | vest |
| car | fox | moose | soup | wheel |
| card | frog | mouse | spade | wig |
| chain | gate | nail | spoon | wolf |
| chef | gift | noose | spring | wood |
| chips | glue | nose | stairs | wool |

**
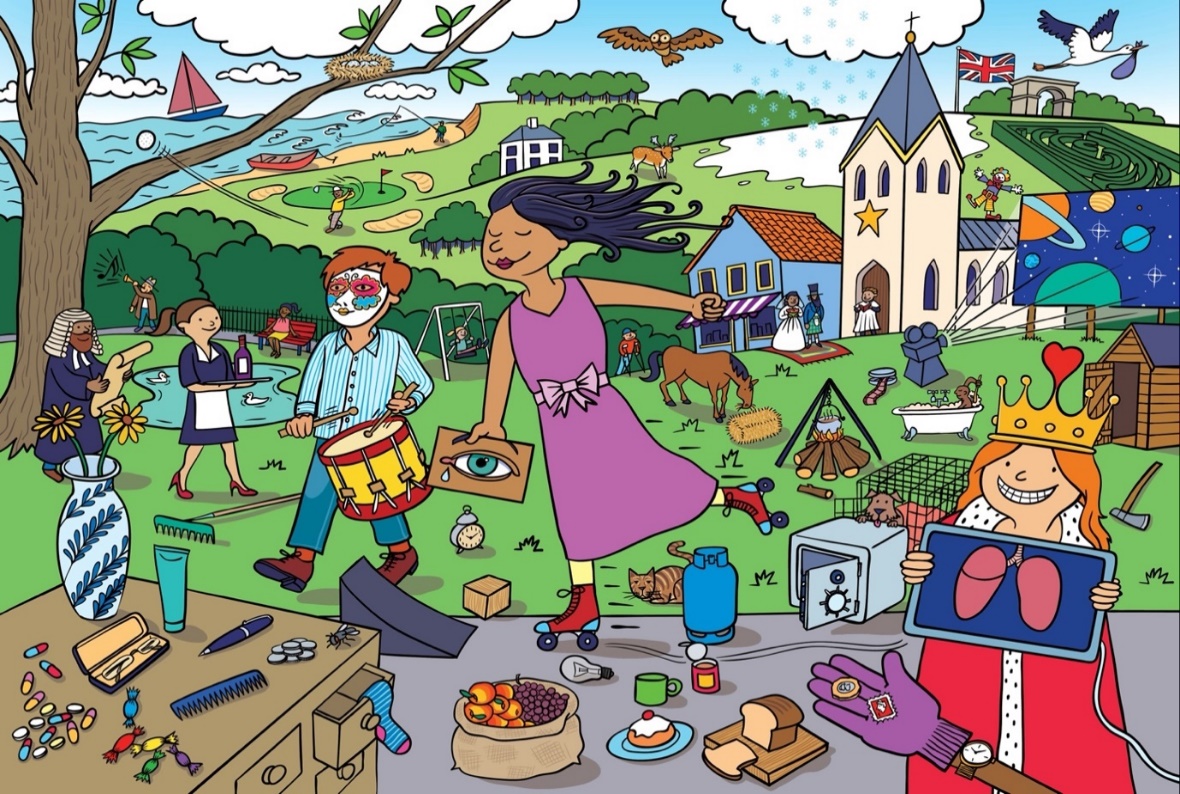
**

**Figure 4.** Picture 4 of 4 used in the custom picture description task.

**Table 4.** Target words embedded in Picture 4.

| Picture 4: 100 items | | | | |
| --- | --- | --- | --- | --- |
| arch | coat | heart | pills | sock |
| axe | coins | heel | pot | sole |
| bath | comb | horse | pound | space |
| beard | crutch | house | priest | stamp |
| bench | deer | jeans | queen | star |
| block | drawers | judge | rake | stork |
| blouse | dress | kilt | ramp | sweet |
| boat | drum | lips | rod | swing |
| bow | eye | log | rug | tail |
| branch | face | lungs | sack | tear |
| bread | film | maid | safe | teeth |
| bride | fist | mask | sail | tile |
| bulb | flag | maze | sand | tin |
| bun | fly | mug | scroll | tray |
| cage | gas | neck | shed | tube |
| case | glove | nest | shirt | vase |
| cat | golf | note | shop | watch |
| church | grapes | park | skate | wave |
| clock | hair | peach | sleeve | wine |
| clown | hay | pen | snow | wing |

**S2. Normative data: demographic and connected speech FLAT measurement-frequency, collocation and connectivity**

Individual FLAT scores of 18 healthy participants on the tailor-made picture description tasks and their demographic data can be found in Table 5 and Table 6.

| **Table 5. Healthy participants’ demographic characteristics** | | | | | |
| --- | --- | --- | --- | --- | --- |
| Participant | Gender | Age (in years) | Highest Level of Education | Handedness | First language |
|  |
| 1 | female | 69 | MA | right | English |  |
| 2 | male | 61 | BA | right | English |  |
| 3 | female | 79 | BA | right | English |  |
| 4 | male | 74 | MA | right | English |  |
| 5 | female | 80 | BA | right | English |  |
| 6 | female | 71 | MSc | right | English |  |
| 7 | male | 81 | BA | right | English |  |
| 8 | male | 63 | Phd | right | English |  |
| 9 | male | 72 | BA | right | English |  |
| 10 | female | 64 | BA | right | English |  |
| 11 | male | 63 | MA | right | English |  |
| 12 | female | 77 | highscool | right | English |  |
| 13 | female | 61 | MA | right | English |  |
| 14 | male | 66 | Phd | right | English |  |
| 15 | male | 61 | BA | irght | English |  |
| 16 | male | 52 | ----- | right | English |  |
| 17 | male | 63 | HNC | right | English |  |
| 18 | male | 58 | BA | right | English |  |

| **Table 6. FLAT measurement in 18 healthy participants** | | | |
| --- | --- | --- | --- |
| Participant | Bigram frequency | Bigram collocation | Connectivity |
|  |
| 1 | 691.97 | 6.06 | 0.82 |  |
| 2 | 2293.52 | 21.12 | 0.70 |  |
| 3 | 1237.68 | 11.54 | 0.77 |  |
| 4 | 1368.81 | 12.19 | 0.77 |  |
| 5 | 1109.39 | 11.00 | 0.83 |  |
| 6 | 1044.59 | 10.23 | 0.80 |  |
| 7 | 763.82 | 7.29 | 0.83 |  |
| 8 | 763.81 | 7.55 | 0.83 |  |
| 9 | 972.13 | 8.75 | 0.76 |  |
| 10 | 1067.58 | 8.17 | 0.83 |  |
| 11 | 1045.17 | 10.19 | 0.78 |  |
| 12 | 858.12 | 8.41 | 0.79 |  |
| 13 | 1058.65 | 9.37 | 0.77 |  |
| 14 | 769.49 | 7.26 | 0.85 |  |
| 15 | 1273.34 | 11.20 | 0.78 |  |
| 16 | 1136.69 | 10.29 | 0.81 |  |
| 17 | 1218.42 | 10.99 | 0.78 |  |
| 18 | 999.89 | 8.87 | 0.88 |  |
| Avg (SD)  range | 1092.94 (356.10)  691 - 2293 | 10.02 (3.25)  6 - 21 | 0.79 (0.04)  0.7-0.88 |  |

**S3. Parcellation of functional ROIs**

Figure 5 shows the functional ROIs from the language network and the multiple demand (MD) network defined by Fedorenko et al. (2010, 2012). These ROIs were used as input masks for the Lesion Quantification Toolkit (Griffis et al., 2021) with the AAL parcellation (Tzourio-Mazoyer et al., 2002). Table 7 lists all the parcels with corresponding proportion included in the analyses.


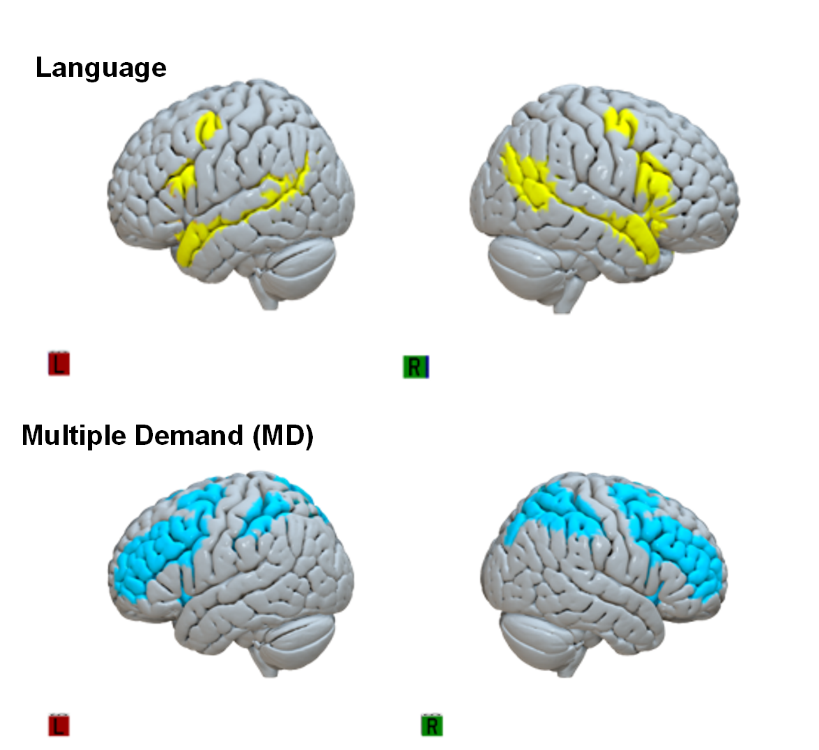


**Figure 5. Cortical surface rendering of two fROIs (rendered in Surf Ice), language network and multiple demand (MD) network.**

**Table 7 – Language and MD networks ROIs and corresponding AAL parcels**

| Functional ROI mask | AAL parcels included | |
| --- | --- | --- |
| ​  Language ​ | ​  Precentral_L (15.14%), Precentral_R (10.09%)  ​  Frontal_Inf_Oper_L (30.23%), Frontal_Inf_Oper_R (31.64%) ​  Frontal_Inf_Tri_L (31.05%), Frontal_Inf_Tri_R  (28.98%)  Frontal_Inf_Orb_L(15.95%), Frontal_Inf_Orb_R  ​(14.49%)  Occipital_Mid_L (10.09%), Occipital_Mid_R  ​(15.36%)  SupraMarginal_L  ​(16.46%)  Angular_L (37.13%), Angular_R ​(26.61%)  Temporal_Sup_L (33.02%), Temporal_Sup_R  ​(38.55%)  Temporal_Pole_Sup_L (26.47%), Temporal_Pole_Sup_R (24.72%) ​  Temporal_Mid_L(65.57%), Temporal_Mid_R  (61.50%)​  Temporal_Pole_Mid_L (22.76%), Temporal_Pole_Mid_R ​(19.55%)  ​ | |
| ​  Multiple Demand (MD) ​ | | ​  Precentral_L (45.85%), Precentral_R (31.86%)  Frontal_Sup_L (26.95%), Frontal_Sup_R  ​(32.63%)  Frontal_Sup_Orb_L ​(11.81%)  Frontal_Mid_L (65.14%), Frontal_Mid_R  ​(64.24%)  Frontal_Mid_Orb_L (20.39%), Frontal_Mid_Orb_R ​(16.23%)  Frontal_Inf_Oper_L (52.53%), Frontal_Inf_Oper_R (54.30%) ​  Frontal_Inf_Tri_L (43.41%), Frontal_Inf_Tri_R  (32.61%)  Supp_Motor_Area_L (28.71%), Supp_Motor_Area_R  (20.83%)  Frontal_Sup_Medial_L  ​(15.80%)  Insula_L (26.79%), Insula_R (24.46%)  ​  Cingulum_Ant_L (14.20%), Cingulum_Ant_R ​(12.29%)  Cingulum_Mid_L (11.36%), Cingulum_Mid_R  ​(19.00%)  Cuneus_R  ​(23.37%)  Occipital_Sup_L (26.20%), Occipital_Sup_R  (38.08%)  Occipital_Mid_L (11.62%), Occipital_Mid_R  (10.72%)​  Postcentral_L (13.04%), Postcentral_R  ​(12.60%)  Parietal_Sup_L (82.65%), Parietal_Sup_R ​(80.60%)  Parietal_Inf_L (86.76%), Parietal_Inf_R (84.47%) ​  SupraMarginal_L (20.13%), SupraMarginal_R  (39.44%)​  Angular_L (18.02%), Angular_R  ​(28.60%)  Precuneus_L (41.05%), Precuneus_R (39.51%)​  ​ |

*Note: Functional ROIs of language-selective and domain-general network are defined by Fedorenko et al. (2010, 2012). Parcels names are defined as the same in AAL* (Tzourio-Mazoyer et al., 2002)*.*

We included overlapping AAL regions when using functional regions of interest (fROIs), excluding only those parcels that comprised less than 10% of the total area. For Language, we excluded five small regions Frontal_Mid_L (1.29%), Insula_R (1.77%), Postcentral_L (0.19%), Temporal_Inf_L (1.3%), and SupraMargnial_R (5.6%). For the Multiple Demand (MD) network, we excluded eight regions: Putamen_L (0.48%), Cuneus_L (6.31%), Frontal_Inf_Orb_L (6.89%), Frontal_Inf_Orb_R (4.91%), Rolandic_Oper_L (2.21%), Rolandic_Oper_R (2.45%), Frontal_Sup_Orb_R (7.77%), and Frontal_Sup_Medial_R (8.10%). All region names follow AAL labels.

**S4. Materials for reproducibility**

Lesion quantification was conducted using the same script provided in Lesion Quantification Toolkit (Griffis et al., 2021) in MATLAB. Python codes of analyse, structural connectivity data and behaviour excel files can be found in [UCL-NT/SNE-repo (github.com)](https://github.com/UCL-NT/SNE-repo). Patient raw data are available under restricted access and can be obtained by direct request to J.C.

**References**

Fedorenko, E., Duncan, J., & Kanwisher, N. (2012). Language-Selective and Domain-General Regions Lie Side by Side within Broca’s Area. *Current Biology*, *22*(21), 2059–2062. https://doi.org/10.1016/J.CUB.2012.09.011

Fedorenko, E., Hsieh, P. J., Nieto-Castañón, A., Whitfield-Gabrieli, S., & Kanwisher, N. (2010). New method for fMRI investigations of language: Defining ROIs functionally in individual subjects. *Journal of Neurophysiology*, *104*(2), 1177–1194. https://doi.org/10.1152/JN.00032.2010/SUPPL_FILE/DESCRIPTIONS.DOCX

Griffis, J. C., Metcalf, N. V., Corbetta, M., & Shulman, G. L. (2021). Lesion Quantification Toolkit: A MATLAB software tool for estimating grey matter damage and white matter disconnections in patients with focal brain lesions. *NeuroImage: Clinical*, *30*, 102639. https://doi.org/10.1016/J.NICL.2021.102639

Tzourio-Mazoyer, N., Landeau, B., Papathanassiou, D., Crivello, F., Etard, O., Delcroix, N., & Joliot, M. (2002). *TECHNICAL NOTE Automated Anatomical Labeling of Activations in SPM Using a Macroscopic Anatomical Parcellation of the MNI MRI Single-Subject Brain*. https://doi.org/10.1006/nimg.2001.0978

Zimmerer, V. C., Hardy, C. J. D., Eastman, J., Dutta, S., Varnet, L., Bond, R. L., Russell, L., Rohrer, J. D., Warren, J. D., & Varley, R. A. (2020). Automated profiling of spontaneous speech in primary progressive aphasia and behavioral-variant frontotemporal dementia: An approach based on usage-frequency. *Cortex*, *133*, 103–119. https://doi.org/10.1016/J.CORTEX.2020.08.027

Zimmerer, V. C., Newman, L., Thomson, R., Coleman, M., & Varley, R. A. (2018). Automated analysis of language production in aphasia and right-hemisphere damage: frequency and collocation strength. *Aphasiology*, *32*(11), 1267–1283. https://doi.org/10.1080/02687038.2018.1497138
